# Supplementary material for: Physiological, Transcriptome, and Metabolome Analyses Reveal the Tolerance to Cu Toxicity in Red Macroalgae Gracilariopsis lemaneiformis
Source: MDPI journal article supplement (doi:10.3390/ijms25094770), 2024-04-27
Supplement: s1 [file s1]

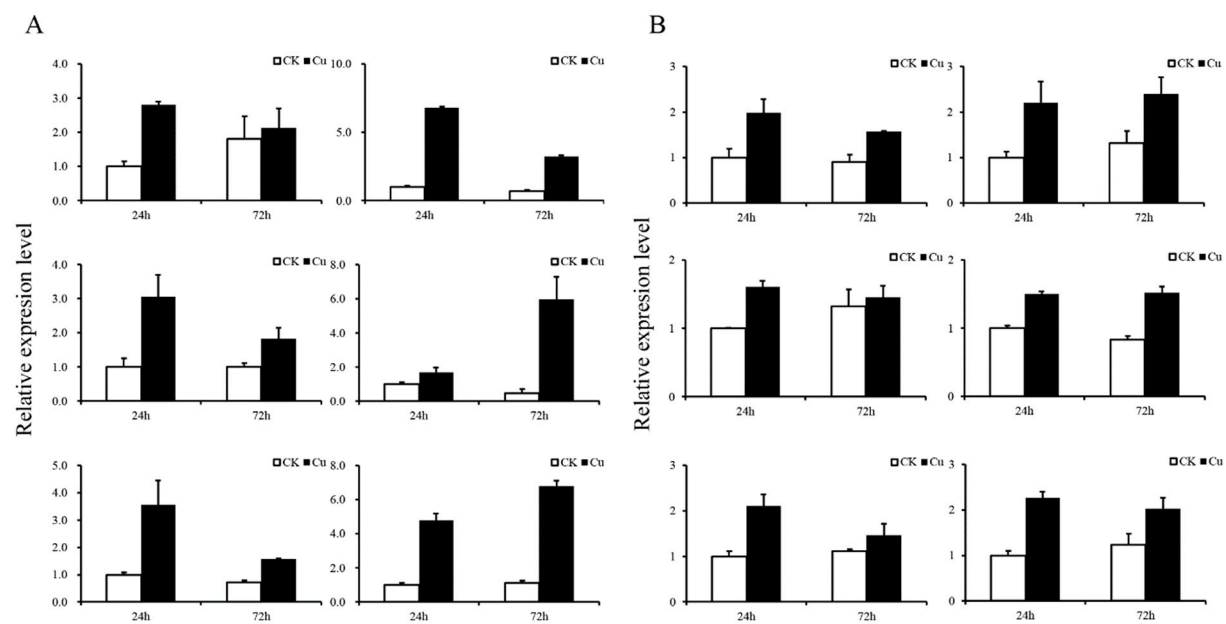

**Supplementary Figure S1.** Comparison of gene expression by RNA-seq (A) and qRT-PCR (B).

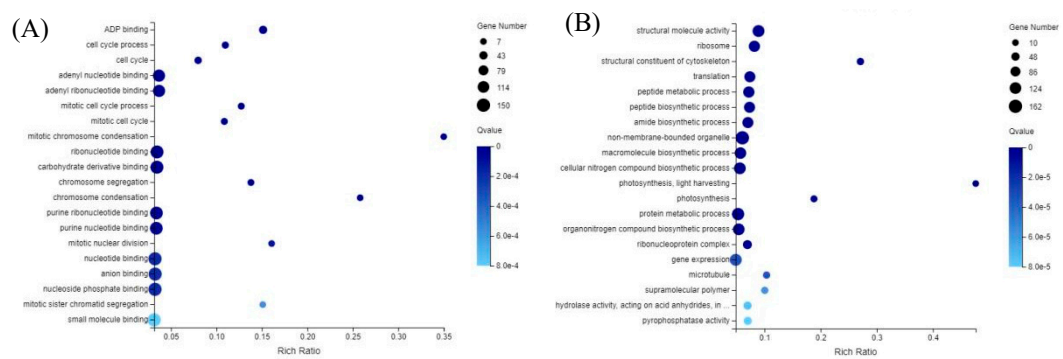

**Supplementary Figure S2.** The GO enrichment top20 based on genes that were up-regulated **(A)** and down-regulated **(B)** at 24h after Cu stress in *G. lemaneiformis*.

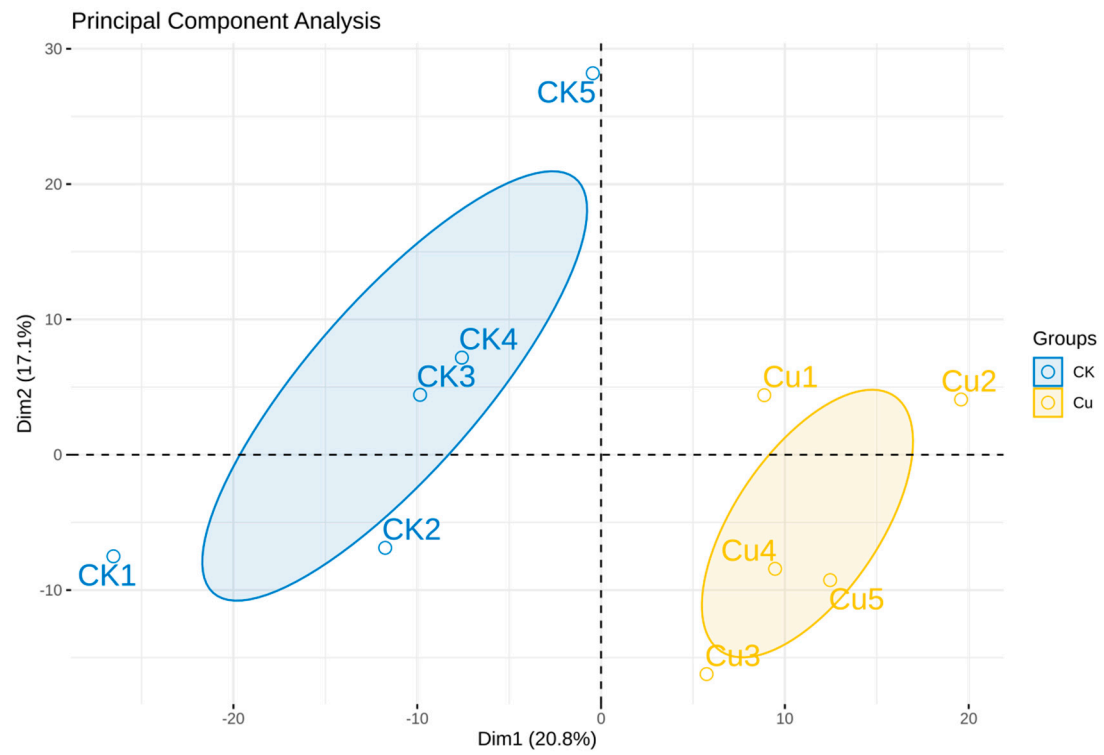

**Supplementary Figure S3.** The PCA analysis of the metabolism of *G. lemaneiformis* compare with Cu treatment and control.
