# Supplementary material for: Physiological, Transcriptome, and Metabolome Analyses Reveal the Tolerance to Cu Toxicity in Red Macroalgae Gracilariopsis lemaneiformis
Source: Int J Mol Sci. 2024 Apr 27;25(9):4770. doi: 10.3390/ijms25094770 (PMC11083833; doi:10.3390/ijms25094770)
Supplement: Supplementary file 1 [file ijms-25-04770-s001.zip › ijms-2906259 supplementary.xlsx]

## Sheet: Sheet1
Supplementary Table S1: Global surveys of the differentially expressed metabolites (DEMs) of G.lemaneiformis treated under Cu stress.
SuperClass	Class	Name	Fold change	p-value	VIP
Benzenoids	Benzene and substituted derivatives	3-o-methylgallic acid	1.08181	0.0276376	3.0169
		4-hydroxy-3-(3-methylbut-2-enyl)benzoic acid	0.828273	0.0105092	1.62378
		Syringic acid	0.753858	0.00745052	1.6172
		Hydroxyflutamide	0.739054	0.00983433	1.45106
Lipids and lipid-like molecules	Fatty Acyls	Eicosapentaenoic acid	1.52335	0.0034677	4.20775
	Steroids and steroid derivatives	NCGC00347372-02	1.42343	0.00132982	1.37458
	Prenol lipids	3-hydroxy-4-keto-gamma-carotene	1.30748	0.00161113	6.77981
	Glycerophospholipids	1,2-dioleoyl-sn-glycero-3-phospho-l-serine	1.25436	0.0437391	1.68241
		1-palmitoyl-2-oleoyl-sn-glycero-3-phosphoethanolamine	1.22033	0.0328842	1.07639
	Glycerolipids	1,2-dihexadecanoyl-sn-glycerol	1.20573	0.0472316	2.34921
	Prenol lipids	Soyasapogenol b base + o-ddmp, o-hexa-hexa	1.18467	0.00797354	7.48098
	Fatty Acyls	2-linoleoylglycerol	0.863664	0.0302353	2.63686
		5-aminovaleric acid betaine	0.796126	0.000419914	1.91569
	Prenol lipids	Ginkgolide a	0.795443	0.0217317	1.20963
	Fatty Acyls	Cis-vaccenic acid	0.770462	0.0199634	1.41034
		Isoprostaglandin-f2.alpha.-iv	0.666614	0.00920419	1.97193
	Prenol lipids	Thymol-beta-d-glucoside	0.590149	0.0274506	3.48007
	Fatty Acyls	Heptadecanoic acid	0.574437	0.0395199	1.31157
	Prenol lipids	Albiflorin	0.377791	9.48463e-05	1.30958
Nucleosides, nucleotides, and analogues	Pyrimidine nucleotides	Udp-galactose	1.84748	0.00186407	1.11887
	Purine nucleosides	Inosine	0.66901	0.00192222	1.23937
		Adenosine	0.564977	0.0248413	20.0119
		Guanosine	0.811305	0.0173455	1.34049
Organic acids and derivatives	Carboxylic acids and derivatives	Gly-Lys	2.14453	0.00537082	1.11167
		DL-isoleucine	1.77713	0.00939737	2.42794
		Antipain	1.39291	0.0165293	1.03305
		Glutathione, oxidized	1.38435	0.0096698	1.19761
		N-(aminothioxomethyl)-5-oxo-1-propyl-2-pyrrolidineacetamide	1.35217	0.0240336	5.3006
		3-aminohexanoic acid	1.34	0.0475478	1.39758
		Trandolapril	1.29372	0.0229793	2.0686
		Glutamine	1.26219	0.0466005	2.86137
		D-Ornithine	1.21021	0.0182808	10.4465
		Gamma-l-glutamyl-l-glutamic acid	0.886132	0.00599634	10.6072
	Peptidomimetics	Microcystin-ly	0.827858	0.0415245	1.13755
	Carboxylic acids and derivatives	Fumonisin la4	0.800389	0.0331141	2.49021
		Pro-ser	0.734384	0.0461346	1.13603
		Ala-Asn-Arg	0.703127	0.000756879	1.1792
		Gly-His-Lys	0.625745	0.0380956	2.90408
		S-methyl-l-cysteine	0.616521	0.0378138	2.04736
		Tyr-Thr	0.597457	0.0252145	1.71762
		G-guanidinobutyrate	0.566012	0.000130563	4.37705
		Ectoine	0.519588	0.01943	1.54699
		Asn-Glu	0.464454	0.00152293	1.71723
Organic nitrogen compounds	Organonitrogen compounds	Nevirapine	0.582869	0.000478093	1.281
Organic oxygen compounds	Organooxygen compounds	D-Galactarate	2.09383	0.0037939	2.92336
		Glycerol	0.914696	0.00864312	1.24133
		3-deoxy-d-glycero-d-galacto-2-nonulosonic acid	0.879397	0.00376499	5.36874
		D-mannitol	0.720681	0.000158547	2.5164
		L-threonate	0.711064	0.0360925	1.57941
		1-Deoxy-D-xylulose 5-phosphate	0.688029	0.00275697	1.68407
		Cycloxydime	0.629311	0.00128353	3.61062
		Trehalose	0.516408	0.0255328	1.41083
		Galactinol	0.484585	0.00855762	1.1344
Organoheterocyclic compounds	Quinolines and derivatives	Flumequine	2.02269	0.00100861	1.00917
	Lactones	L-gulono-1,4-lactone	1.99073	0.000324617	4.49017
	Imidazopyrimidines	7-methyladenine	1.68479	0.0169307	1.38805
		Adenine	0.617168	0.0209094	6.66694
	Lactams	Meropenem	0.101467	5.99576e-05	1.17851
Organosulfur compounds	Thioethers	Propanoic acid, 2-[[4-[2-[[(cyclohexylamino)carbonyl](4-cyclohexylbutyl)amino]ethyl]phenyl]thio]-2-methyl-	0.710721	0.0343932	1.60444
		3-(methylthio)-1-propanol	0.509467	0.00549902	1.10044
Phenylpropanoids and polyketides	Diarylheptanoids	[(2r,3s,4s,5r,6r)-6-[1,7-bis(3,4-dihydroxyphenyl)-5-oxoheptan-3-yl]oxy-3,4,5-trihydroxyoxan-2-yl]methyl (e)-3-(3,4-dimethoxyphenyl)prop-2-enoate	1.27502	0.0216137	1.26247
	Flavonoids	Myricetin	0.74862	0.0474575	2.95398
	Diarylheptanoids	Curcumin	0.398653	0.00469109	1.27146
	Macrolides and analogues	Zearalenone	0.362461	0.0361553	1.19015
Others		4-methoxy-6-[2-(4-methoxyphenyl)ethyl]pyran-2-one	4.39249	0.000160688	1.35386
		Prometryn	3.16116	2.62296e-05	2.46825
		1-methylpseudouridine	2.38924	0.0007107	1.08717
		Acetyl-DL-Valine	1.40507	0.0197565	1.73072
		Thioetheramide-PC	1.1486	0.00438328	3.32444
		Perseitol	1.13624	0.0229169	3.09879
		S-methylisothiourea	0.756199	0.0389199	1.61828
		2-arachidonoylglycerol	0.627723	0.0339591	1.13551
		Hydroquinidine	0.621517	0.0367936	3.3559
		Acetic acid, phenyl ester	0.618413	0.00208879	1.51445
		Hydrocodone	0.598045	0.0111849	1.95035
A number on a red background indicates an increase expression of DEM while a blue-gray background indicates a de-crease expression of DEM.

## Sheet: Sheet2
Supplementary Table S2. The RNA integrity number (RIN) of all RNA samples.
Number	sample name	RIN	28S/ 18S	Library building type	Result description
1	CK1	8.9	2.0	DNBSEQ RNA-Seq(Quantification)	A
2	CK2	8.9	2.0	DNBSEQ RNA-Seq(Quantification)	A
3	CK3	8.9	2.1	DNBSEQ RNA-Seq(Quantification)	A
4	Cu1	8.6	2.0	DNBSEQ RNA-Seq(Quantification)	A
5	Cu2	7.8	1.7	DNBSEQ RNA-Seq(Quantification)	A
6	Cu3	8.9	2.1	DNBSEQ RNA-Seq(Quantification)	A
